# Supplementary material for: Association Between Occlusal Relationships During Sleep Bruxism and Orofacial System Diseases: A Cross-Sectional Study of a Self-Established Cohort in Young and Middle-Aged Adults
Source: Research Square preprint supplement (doi:10.21203/rs.3.rs-8229260/v1), 2025-12-04
Supplement: Supplementary file 1 [file 57a06de12ac4ebd5c017a411.docx]

**Table 1. Characteristic of Participants**

|  | | | Occlusal Relationship Score | | | | |
| --- | --- | --- | --- | --- | --- | --- | --- |
|  | Level | Overall | 0 | 1 | 2 | 3 | p |
| Teeth,n(%) |  | 924 | 436 | 340 | 122 | 26 |  |
| Age, mean(SD) |  | 29.48 (6.21) | 30.09 (5.87) | 29.65 (6.31) | 26.95 (5.82) | 29.00 (9.11) | <0.001 |
| Sex, n(%) | Female | 476 (51.5) | 242 (55.5) | 158 (46.5) | 68 (55.7) | 8 (30.8) | 0.009 |
|  | Male | 448 (48.5) | 194 (44.5) | 182 (53.5) | 54 (44.3) | 18 (69.2) |  |
| HR, mean (SD) |  | 84.42 (10.35) | 85.17 (10.18) | 84.66 (10.49) | 81.95 (10.68) | 80.38 (7.22) | 0.004 |
| SBP, mean (SD) |  | 117.12 (13.26) | 116.86 (14.06) | 115.69 (12.05) | 120.26 (12.61) | 125.46 (12.78) | <0.001 |
| DBP, mean (SD) |  | 76.70 (9.61) | 77.10 (9.61) | 75.28 (9.41) | 78.54 (9.59) | 79.85 (9.93) | 0.001 |
| BMI, n(%) | <18.5kg/m2 | 112 (12.1) | 48 (11.0) | 50 (14.7) | 12 (9.8) | 2 (7.7) | 0.375 |
|  | 18.5-24.9 kg/m2 | 616 (66.7) | 288 (66.1) | 226 (66.5) | 86 (70.5) | 16 (61.5) |  |
|  | ≥25kg/m2 | 196 (21.2) | 100 (22.9) | 64 (18.8) | 24 (19.7) | 8 (30.8) |  |
| Smoking Status, n (%) | Never | 700 (75.8) | 328 (75.2) | 242 (71.2) | 108 (88.5) | 22 (84.6) | 0.001 |
|  | Current | 224 (24.2) | 108 (24.8) | 98 (28.8) | 14 (11.5) | 4 (15.4) |  |
| Alcohol intake, n (%) | Never | 784 (84.8) | 384 (88.1) | 276 (81.2) | 104 (85.2) | 20 (76.9) | 0.039 |
|  | Current | 140 (15.2) | 52 (11.9) | 64 (18.8) | 18 (14.8) | 6 (23.1) |  |
| ANB, n(%) | <2 | 336 (36.4) | 148 (33.9) | 148 (43.5) | 30 (24.6) | 10 (38.5) | 0.001 |
|  | 2-6 | 504 (54.5) | 240 (55.0) | 168 (49.4) | 84 (68.9) | 12 (46.2) |  |
|  | >6 | 84 (9.1) | 48 (11.0) | 24 (7.1) | 8 (6.6) | 4 (15.4) |  |
| OPSN, n (%) | >15 | 392 (42.4) | 176 (40.4) | 148 (43.5) | 58 (47.5) | 10 (38.5) | 0.002 |
|  | 15-23 | 504 (54.5) | 252 (57.8) | 182 (53.5) | 58 (47.5) | 12 (46.2) |  |
|  | <23 | 28 (3.0) | 8 (1.8) | 10 (2.9) | 6 (4.9) | 4 (15.4) |  |
| MPSN, n (%) | >29 | 392 (42.4) | 174 (39.9) | 144 (42.4) | 62 (50.8) | 12 (46.2) | 0.194 |
|  | 29-37 | 364 (39.4) | 174 (39.9) | 132 (38.8) | 48 (39.3) | 10 (38.5) |  |
|  | <37 | 168 (18.2) | 88 (20.2) | 64 (18.8) | 12 (9.8) | 4 (15.4) |  |
| Tooth Guidance, n (%) |  | 356 (38.5) | 0 (0.0) | 234 (68.8) | 96 (78.7) | 26 (100.0) | <0.001 |
| Occlusal Interference, n (%) |  | 236 (25.5) | 0 (0.0) | 90 (26.5) | 120 (98.4) | 26 (100.0) | <0.001 |
| Guidance Slope, n (%) |  | 70 (7.6) | 0 (0.0) | 16 (4.7) | 28 (23.0) | 26 (100.0) | <0.001 |
| Anxiety, n (%) |  | 476 (51.5) | 208 (47.7) | 176 (51.8) | 78 (63.9) | 14 (53.8) | 0.017 |
| Depression, n (%) |  | 196 (21.2) | 78 (17.9) | 86 (25.3) | 30 (24.6) | 2 (7.7) | 0.019 |
| Stress, n (%) |  | 224 (24.2) | 86 (19.7) | 96 (28.2) | 32 (26.2) | 10 (38.5) | 0.012 |
| Comorbidities, n (%) |  | 56 (6.1) | 32 (7.3) | 14 (4.1) | 8 (6.6) | 2 (7.7) | 0.298 |

**※HR: Hert Rate; SBP: Systolic Blood Pressure; DBP: Diastolic Blood Pressure; BMI: Body Mass Index; ANB: A point–Nasion–B point angle;**

**MP-SN: Mandibular Plane to Sella–Nasion plane angle; OP-SN：Occlusal Plane to Sella–Nasion plane angle**
